# Supplementary material for: Nitrogen Deficiency Tolerance and Responsiveness of Durum Wheat Genotypes in Ethiopia
Source: Hindawi journal article supplement (doi:10.1155/2022/9506078), 2022-12-09
Supplement: f1 [file 9506078.f1.docx]

**Supplementary Materials**

Table S1 Description of durum wheat genotypes used for the experiment

| **NO** | **GENOTYPES** | **SOURCE** | **PEDIGREE/ ID/ACCESSIONS** |
| --- | --- | --- | --- |
| 1 | FIGSDRYWET016 | ICARDA | RUSS199/ID-82244 |
| 2 | FIGSDRYWET078 | ICARDA | AFG68::77/ID-90233 |
| 3 | FIGSDWHOTCLD015 | ICARDA | ETH732::91/ID-81510 |
| 4 | FIGSDRYWET028 | ICARDA | ETH64:112/ID-83807 |
| 5 | DURUM_PANEL_UNIBO-054 | ICARDA | D333/GAVIOIA/4/AVETORO//ALUINCO/D/EIOD/ID-MARJANA MOROCCO |
| 6 | FIGSDRYWET001 | ICARDA | OMN87:113/ID-43315 |
| 7 | DURUM_PANEL_UNIBO-048 | ICARDA | INRA1807 /ID-CHAOUI MOROCCO |
| 8 | Land race | EBI | ETH CHEFE-9 |
| 9 | Land race | EBI | ETH 208474 |
| 10 | Land race | EBI | ETH 2368039 |
| 11 | Land race | EBI | ETH 222796 |
| 12 | FIGSDWHOTCLD009 | ICARDA | ETH74::56/ID-79653 |
| 13 | Land race | EBI | ETH 203762 |
| 14 | FIGSDRYWET0144 | ICARDA | IRNS382/ID-119026 |
| 15 | DURUM_PANEL_UNIBO-081 | ICARDA | ID-BRAVADUR,SW USA |
| 16 | FIGSDRYWET091 | ICARDA | ETH731::112/ID-90482 |
| 17 | FIGSDRYWET108 | ICARDA | IRNS294/ID-98797 |
| 18 | Land race | EBI | ETH 226804 |
| 19 | ICARASHA2 | ICARDA | Stj3/Ber/Lks4/3/Ter3 |
| 20 | Land race | EBI | 238498 |
| 21 | Land race | EBI | ID-MU350/238498 |
| 22 | Land race | EBI | ID-MU386/208215 |
| 23 | Land race | EBI | ID-MU369/215411 |
| 24 | Land race | EBI | ID-MU71/222859 |
| 25 | Land race | EBI | ID-MU46/208746 |
| 26 | Foka | DZARC | COCORIT-71/CANDEAL-II[**[1551]**](http://wheatpedigree.net/refer/ajaxShow/1551)[**[2837]**](http://wheatpedigree.net/refer/ajaxShow/2837) |
| 27 | Bichena | DZARC | IUMILLO/COCORIT-71[**[1551]**](http://wheatpedigree.net/refer/ajaxShow/1551) |
| 28 | Land race | EBI | ID-MU367/208316 |
| 29 | Land race | EBI | ID-MU282/222408 |
| 30 | Denbi | DZARC | AJAIA/BAUSHEN[**[3589]**](http://wheatpedigree.net/refer/ajaxShow/3589) |
| 31 | Land race | EBI | ID-MU398/236988 |
| 32 | Land race | EBI | ID-MU193/238531 |
| 33 | Land race | EBI | ID-MU389/202012 |
| 34 | Land race | EBI | ID-MU329/208162 |
| 35 | Land race | EBI | ID-MU19/228862 |
| 36 | Land race | EBI | ID-MU397/236269 |
| 37 | Boohai | DZARC | COOT(SIB)/CANDEAL-II[**[40]**](http://wheatpedigree.net/refer/ajaxShow/40)[**[115]**](http://wheatpedigree.net/refer/ajaxShow/115)[**[1551]**](http://wheatpedigree.net/refer/ajaxShow/1551)[**[2837]**](http://wheatpedigree.net/refer/ajaxShow/2837) |
| 38 | Land race | EBI | ID-MU375/222414 |
| 39 | Land race | EBI | ID-MU274/210817 |
| 40 | Land race | EBI | ID-MU320/222655 |
| 41 | Quamy | DZARC | FLAMINGO,MEX/CRANE//FLAMINGO/3/HUIT |
| 42 | Land race | EBI | ID-MU295/8034 |
| 43 | Land race | EBI | ID-MU56/238555 |
| 44 | Land race | EBI | ID-MU77/222856 |
| 45 | Land race | EBI | 222413 |
| 46 | Land race | EBI | 222298 |
| 47 | Land race | EBI | 236987 |
| 48 | Land race | EBI | 222191 |
| 49 | Land race | EBI | 238133 |
| 50 | Land race | EBI | 7960 |
| 51 | Land race | EBI | 231538 |
| 52 | Land race | EBI | 138130 |
| 53 | Land race | EBI | 231541 |
| 54 | Land race | EBI | 231594 |
| 55 | Land race | EBI | 226958 |
| 56 | Land race | EBI | 204563 |
| 57 | Land race | EBI | 222415 |
| 58 | Land race | EBI | 8175 |
| 59 | Land race | EBI | 231573 |
| 60 | Land race | EBI | 222629 |
| 61 | Land race | EBI | 226963 |
| 62 | Land race | EBI | 231499 |
| 63 | Land race | EBI | 238138 |
| 64 | Land race | EBI | 238122 |
| 65 | Land race | EBI | 231597 |
| 66 | Land race | EBI | 208931 |
| 67 | Land race | EBI | 204573-1 |
| 68 | Land race | EBI | 222387 |
| 69 | Land race | EBI | 227009 |
| 70 | Land race | EBI | 226971-2 |
| 71 | Land race | EBI | 208261 |
| 72 | Land race | EBI | 7961 |
| 73 | Land race | EBI | 222568 |
| 74 | Land race | EBI | 231536-1 |
| 75 | Land race | EBI | 236974-1 |
| 76 | Land race | EBI | 222198 |
| 77 | Land race | EBI | 222382 |
| 78 | Land race | EBI | 238135 |
| 79 | Land race | EBI | 231584 |
| 80 | Land race | EBI | 204485 |
| 81 | Land race | EBI | 8356 |
| 82 | Land race | EBI | 231585 |
| 83 | Land race | EBI | 227007 |
| 84 | Land race | EBI | 238134 |
| 85 | Land race | EBI | 8333-2 |
| 86 | CD15DZ_ELT/off/1084/2015 | CIMMYT | CMH83.2578/4/D88059//WARD/YAV 79/3/ACO89/5/2*SOOTY.9/RASCON-37/6/1A.1D 5+1-6/… |
| 87 | CD15DZ_ELT/off/1024/2015 | CIMMYT | JUPARE C2001*2/1M/10/KOFA/9/USDA 595 /3/D67.3/RABI//CRA/4/ALD/5/HUI/YAV-1/16/… |
| 88 | CD15DZ_ELT/off/994/2015 | CIMMYT | JUPARE C 2001* 2/RBC/5/MOHAWK/3/GUANAY//TILD-1LDTUS-4/4/ARMENT //SRN- 3/… |
| 89 | CD15DZ_ELT/off/253/2015 | CIMMYT | BHA/5/MOHAWK/4/DUKEM-1//PATKA-7/YAZI-1/3/PATKA-7/YAZI-1/6/CF4205/4/YAZI-1… |
| 90 | CD15DZ_ELT/off/943/2015 | CIMMYT | LILE/6/CF4 205/4/YAZI-1AKAKI-4//SOMAT3/3AUK/GUIL//GREEN /5/CANELD-9.1//… |
| 91 | CD15DZ_ELT/off/950/2015 | CIMMYT | YAVA 79/9/ USDA 595/3 /D67.3 /RABI/  /CRA/4/ALO/5/HUI/YAV-1/6/ARDENTE /7/HUI/YAV 79/8/… |
| 92 | CD15DZ_ELT/off//248/2015 | CIMMYT | CF4 20S/4/YAZI-1AKAKI-4//SOMAT 3/3/AUK/GUIL//GREEN/5/CANELD-9.1//SHAKE-3/… |
| 93 | CD15DZ_ELT/off/275/2015 | CIMMYT | CF4 20S/4/YAZI-1/AKAKI-4//SOMAT-3/3/AUK/GUIL//GREEN/5/CANELD-9.1//SHAKE-3/… |
| 94 | CD15DZ_ELT/off/982/2015 | CIMMYT | ALTAR 84/STINT//SILVER-45/3/GUANAY/4/GREEN-14//YAV-10/AUK/10/CMH79.959/CHEN//… |
| 95 | CD15DZ_ELT/off/1029/2015 | CIMMYT | JUPAREC2001*2/KHAPLI/4/INRAM-1805//SOMAT-4/INTER-8/3/SOOTY-9/RASCON-37//… |
| 96 | CDSS09B00191T-099Y-020M-6Y00M | CIMMYT | RBC/7/CMH83.2578/4/D88059//WARD/YAV79/3/ACO89/5/2*S00TY-9/RASCON-37/6/… |
| 97 | CDSS09B00067S-099Y-035M-3Y-0M | CIMMYT | STORLOM/3/RASCON-37//TARRO-2//RASCON-37/4/D00003A/5/1A.1D5+1-06/3*Mojo/3/AJAIA-12/… |
| 98 | CDSS09B00203T-099Y-066M-2Y-0M | CIMMYT | CIT71/5/MOHAWK/4/DUKEM-1//PATKA-7/YAZI-1/3/PATKA-7/YAZI-1/7/CMH83. 2578/4/D88059//… |
| 99 | ICD08-291-0AP | CIMMYT | otb4/3/HFN94N-8/Mrb5//Zna-1/4/5+j3//Dra2/Bcr/3/Ter-3 |
| 100 | CDSS09B00190T-099Y-036M-18Y-0M | CIMMYT | RBC/HUALITA/5/MOHAWK/3/GUANAY//TILO-1/LOTUS-4/4/ARMENT//SRN-3/NIGRIS-4/3/… |
| 101 | CD15DZ_ELT/off/1103/2015 | CIMMYT | KOFA/9/USDA595/3/D67.3/RABI//CRA/4/ALO/5/HUI/YAV-1/6/ARDENTE/7/HUI/YAV79/8/… |
| 102 | CD15DZ_ELT/off/1116/2015 | CIMMYT | JUPARE C2001*2/IM/5/KOFA/4/DUKEM-1//PATAK-7YAZI-1/3/PATKA/7/YAZI-1/6/ALAS/… |
| 103 | CD15DZ_ELT/Off/1102/2015 | CIMMYT | KOFA/9/USDA595/3/D67.3/RABI//CRA/4/ALO/5/HUI/YAV-1/6/ARDENTE/7/HUI/YAV79/8/… |
| 104 | CD15DZ_ELT/off//1057/2015 | CIMMYT | KRON05/10/KOFA/9/USDA595/3/D67.3/RABI//CRA/4/ALO/5/HUI/HAV-1/6/RADENTE/7/HUI/… |
| 105 | CD15DZ_ELT/off/999/2015 | CIMMYT | JUPARE C2001*2/RBC/11/PLATA-10/6/MQUE/4/USDA/573//QFN/AA-7/3/ALBA/D/5/AVO/HUI/7/… |
| 106 | CD15DZ_ELT/off/1112/2015 | CIMMYT | JURARE C2001*2/IM/7/CMH83.2578/4/D88059//WARD/YAV79/3/AC089/5/2*S00TY-9/… |
| 107 | CD15DZ_ELT/off/1067/2015 | CIMMYT | CHAM 1 /5/MOHAWK/3/GUANAY//TILO-1/LOTUS-4/4/ARMENT//SRN-3/NIGRIS-4/3/CANELO-9.1/6/… |
| 108 | CD15DZ_ELT/off/1094/2015 | CIMMYT | STORLOM/3/RASCON-37/TARRO-2//RASCON-37/4/D00003A/5/1A.1D5+1-06/3*MOJO/3/AJAIA-12/… |
| 109 | CD13DZOS F6SR 2013 MS DZLS/22 | CIMMYT | C F4 20S/4/YAZI-1/AKAKI-4//S0MAT-3/3/AUK/GUIL//GREEN/5/CANEL0-9.1//SHAKE-3/… |
| 110 | CD13DZOS F6SR 2013 MS DZLS/93 | CIMMYT | K0FA/9/USDA595/3/D67.3/RABI//CRA/4/AL0/5/HUI/YAV-1/6/ARDENTE/7/HUI/YAV79/8/… |
| 111 | CD13DZOS F6SR 2013 MS DZLS/106 | CIMMYT | RBC/HULITA/5/M0HAWK/3/GUANAY//TIL0-1/L0TUS-4/4/ARMENT//SRN-3/NIGRIS-4/3/… |
| 112 | CD13DZOS F6SR 2013 MS DZLS/81 | CIMMYT | CF420S/4/YAZI-1/AKAKI-4//S0MAT-3/3/AUK/GUIL//GREEN/5/CANEL0-9.1//SHAKE-3/… |
| 113 | CD13DZOS F6SR 2013 MS DZLS/105 | CIMMYT | RBC/HULITA/5/M0HAWK/3/GUANAY//TIL0-1/L0TUS-4/4/ARMENT//SRN-3/NIGRIS-4/3/… |
| 114 | CD13DZOS F6SR 2013 MS DZLS/84 | CIMMYT | C F4 20S/4/YAZI-1/AKAKI-4//S0MAT-3/3/AUK/GUIL//GREEN/5/CANEL0-9.1//SHAKE-3/… |
| 115 | CD13DZOS F6SR 2013 MS DZLS/111 | CIMMYT | RBC/5/ARMENT//SRN-3/NIGRIS-4/3/CANEL0-9.1/4/LIR0-3/L0TAIL-6/6/C F4 20S/4/YAZI-1/… |
| 116 | CD13DZOS F6SR 2013 MS DZLS/83 | CIMMYT | CF420S/4/YAZI-1/AKAKI-4//S0MAT-3/3/AUK/GUIL//GREEN/5/CANEL0-9.1//SHAKE-3/… |
| 117 | CD13DZOS F6SR 2013 MS DZLS/87 | CIMMYT | C F4 20S/4/YAZI-1/AKAKI-4//S0MAT-3/3/AUK/GUIL//GREEN/5/CANEL0-9.1//SHAKE-3/… |
| 118 | CD13DZOS F6SR 2013 MS DZLS/80 | CIMMYT | C F4 20S/4/YAZI-1/AKAKI-4//S0MAT-3/3/AUK/GUIL//GREEN/5/CANEL0-9.1//SHAKE-3/… |
| 119 | CD13DZOS F6SR 2013 MS DZLS/97 | CIMMYT | K0FA/9/USDA595/3/D67.3/RABI//CRA/4/AL0/5/HUI/YAV-1/6/ARDENTE/7/HUI/YAV79/8/… |
| 120 | CD15DZ_ELT/off/251/2015 | CIMMYT | CF420S/4/YAZI-1AKAKI-4//SOMAT-3/3/AUK/GUIL//GREEN/5/CANELD-9.1//SHAKE-3/… |
| 121 | CD15DZ_ELT/off/1006/2015 | CIMMYT | JUPARE C2001*2/RBC/6/STORLOM/3/RASCON-37/TARRD-2//RASCON-37/4/D00003A/5/… |
| 122 | CD15DZ_ELT/off/989/2015 | CIMMYT | TRIDENT /3*KUCUK/7/CMH83 2578/4/D88059//WARD/YAV 79/3/AC089/5/2*SOOTY-9/RASCON-37/6/… |
| 123 | CD15DZ_ELT/off/303/2015 | CIMMYT | AGI 22/2*ACO89//2*UC1113/3/5*KOFA/5KOFA/4/DUKEM-1//PATKA-7/YAZI-1/3/PATKA-7/… |
| 124 | CD15DZ_ELT/off/1035/2015 | CIMMYT | CMH83.2578/4/D88059//WARD/YAV79/3/AC089/5/2*S00TY-9/RASCON-37/6/1A.1D 5+1-06/… |
| 125 | CD15DZ_ELT/off/1034/2015 | CIMMYT | CMH83.2578/4/D88059//WARD/YAV79/3/AC089/5/2*S00TY-9/RASCON-37/6/1A.1D 5+1-06/… |
| 126 | CD15DZ_ELT/off/1038/2015 | CIMMYT | WID22289/10/SWAHEN-2/KIRKI-8//PROZANA-1/4/ADAMAR-15//ALBIA-1/LTAR84/3/SNITAN/9/… |
| 127 | CD15DZ_ELT/off/1115/2015 | CIMMYT | JUPARE C2001*2/IM/5/KOFA/4/DUKEM-1//PATAK-7YAZI-1/3/PATKA/7/YAZI-1/6/ALAS/… |
| 128 | CD15DZ_ELT/off/1037/2015 | CIMMYT | BOLENGA/10/KOFA/9/USDA595/3/D67.3/RABI//CRA/4/ALO/5/HUI/YAV-1/6/ARDENTE/7/HUI/… |
| 129 | CD15DZ_ELT/off/1069/2015 | CIMMYT | CHAM1/4/INRAM-1005//SOMAT-4/INTER/8/3/SOOTY-9/RASOON-37//TILO-1/LOTUS-4/5/… |
| 130 | CD15DZ_ELT/off/1079/2015 | CIMMYT | CMH83.2578/4/D88059//WARD/YAV79/3/AC089/5/2*S00TY-9/RASCON-37/6/1A.1D 5+1-06/… |
| 131 | CD15DZ_ELT/off/998/2015 | CIMMYT | JUPARE C 2001*2/RBC /11/PLATA-10/6/MQUE/4/USDA573//QFN/AA-7/3/ALBA-D/5/AVO/HUI/7/… |
| 132 | CD15DZ_ELT/off/1000/2015 | CIMMYT | JUPARE C 2001*2/RBC /11/PLATA-10/6/MQUE/4/USDA573//QFN/AA-7/13/ALBA-D/5/AVO/HUI/7/… |
| 133 | CD15DZ_ELT/off/1025/2015 | CIMMYT | JUPARE C 2001*2/IM/10/KOFA/9/USDA595/3/D67.3/RABI//CRA/4/ALO/5/HUI/YAV-1/6/… |
| 134 | CD15DZ_ELT/off/980/2015 | CIMMYT | ALTAR.84/STINT//SILVER-45/3/GUANAY/4/GREEN-14//YAV-10/AUK/10/CMH79.959/CHEN//… |
| 135 | CD15DZELT/off/973/2015 | CIMMYT | ALAM0:DR/4/ARMENT//SRN-3/NIGRIS-4/3/CANEL0-9.1/5/PLATA-6/GREEN-17//SNITAN/4/… |
| 136 | CD15DZELT/off/1117/2015 | CIMMYT | JUPAREC2001*2/IM/5/K0FA/4/DUKEM-1// PATKA-7/YAZI-1/3/PATKA-7/YAZI-1/6/ALAS/… |
| 137 | CD15DZELT/off/849/2015 | CIMMYT | NASSIRA/10/PLATA-10/6/MQUE/4/USDA573//QFN/AA-7/3/ALBA-D/5/AV0/HUI/7/PLATA-13/8/… |
| 138 | CD15DZELT/off/306/2015 | CIMMYT | AG 1-22/2*AC089//2*UC1113/3/5*K0FA/5/K0FA/4/DUKEM-1//PATKA-7/YAZI-1/3/PATKA-7/… |
| 139 | CD15DZELT/off/846/2015 | CIMMYT | AMRIA/6/ALTAR84/STINT//SILVER-45/3/GUANAY/4/GREEN-14//YAV-10/AUK/5/S0MAT-4/… |
| 140 | CD15DZELT/off/1239/2015 | CIMMYT | GER0MTEL-3/8/ST0T//ALTAR84/ALD/3/THB /CEP7780//2*MUSK-4/6/EC0/CMH76A.722//… |
| 141 | CD15DZELT/off/889/2015 | CIMMYT | GEROMTEL-3/7/ALTAR84/BINTEPE85/3/ST0T//  ALTAR84/ALD/4/P00-11/YAZI-1/5/… |
| 142 | CD15DZELT/off/891/2015 | CIMMYT | GEROMTEL-3/7/ALTAR84/BINTEPE85/3/ST0T  //ALTAR84/ALD/4/P0D-11/YAZI-1/5/… |
| 143 | CD15DZELT/off/1235/2015 | CIMMYT | TA5057/10/2*CMH85.797//DUKEM-12/2*RASC0N-21/9/USDA595/3/D67.3/RABI//… |
| 144 | CD15DZELT/off/1072/2015 | CIMMYT | CMH83.2578/4/D88059//WARD/YAV79/3/AC089/5/2*S00TY-9/RASC0N-37/6/1A.1D5+1-06/… |
| 145 | CD15DZELT/off/664/2015 | CIMMYT | GER0MTEL-3/10/CHEN-1/TEZ/3/GUIL//CIT71/CII/4/S0RA/PLATA-12/5/ST0T//ALTAR84/… |
| 146 | CD15DZELT/off/745/2015 | CIMMYT | CND0/VEE//PLATA-8/3/6*PLATA-11/6/PLATA-8/4/GARZA/AFN//CRA/3/GTA/5/RASC0N/9/… |
| 147 | CD15DZELT/off/790/2015 | CIMMYT | AMRIA/6/ALTAR84/STINT//SILVER-45/3/GUANAY/4/GREEN-14//YAV-10/AUK/5/S0MAT-4/… |
| 148 | CD15DZELT/off/792/2015 | CIMMYT | AMRIA/8/ST0T//ALTAR84/ALD/3/THB CEP7780//2*MUSK-4/6/EC0/CMH76A.722//BIT/3/… |
| 149 | CD15DZELT/off/801/2015 | CIMMYT | GER0MTEL-3/6/S0MAT-3/PHAX-1//TIL0-1/L0TUS-4/3/GUANAY/5/NETTA-4/DUKEM-12//… |
| 150 | CD15DZELT/off/802/2015 | CIMMYT | GER0MTEL-3/9/GUANCAN INIA/GUANAY  /8/GEDIZFG0//GTA/3/SRN1/4/T0TUS/5/ENTE/MEXI-2//… |
| 151 | CD15DZELT/off/935/2015 | CIMMYT | C0RDEIR0/9/GUAYACAN INIA/GUANY/8/GEDIZ FG0//GTA/3/SRN-1/4/TOTUS/5/ENTE/MEXI-2//… |
| 152 | CD15DZELT/off/981/2015 | CIMMYT | ALTAR84/STINT//SILVER-45/3/GUANAY /4/  GREEN-14//YAV-10/AUK/10/CMH79.959  /CHEN//… |
| 153 | CD15DZELT/off/995/2015 | CIMMYT | JUPARE C 2001*2/RBC/11/PLATA-10/6/MQUE  /4/USDA573//QFN/AA-7/3/ALBA-D/5/AV0  /HUI/7/… |
| 154 | CD15DZELT/off/1032/2015 | CIMMYT | JUPARE C 2001*2/KHAPLI/5/M0HAWK/4/DUKEM  -1//PATKA-7/YAZI-1/3/PATKA-7YAZI-1/11/… |
| 155 | CD15DZELT/off/1081/2015 | CIMMYT | CMH83.2578/4/D88059//WARD/YAV79/3/AC089/5/2*S00TY-9/RASC0N-37/6/1A.1D5+1-06/… |
| 156 | CD15DZ-ELT/off/1082/2015 | CIMMYT | CMH83.2578/4/D88059//WARD/YAV79/3/AC089/5/2*S00TY-9/RASC0N-37/6/1A.1D5+1-06/… |
| 157 | CD15DZELT/off/1087/2015 | CIMMYT | CMH83.2578/4/D88059//WARD/YAV79/3/AC089/5/2*S00TY-9/RASC0N-37/6/1A.1D5+1-06/… |
| 158 | CD15DZELT/off/1129/2015 | CIMMYT | KR0N0S/10/K0FA/9/USDA595/3/D67.3/RABI//CRA/4/AL0/5/HUI/YAV-1/6/ARDENT/7/HUI/… |
| 159 | CD15DZELT/off/1131/2015 | CIMMYT | CMH83.2578/4/D88059//WARD/YAV79/3/AC089/5/2*S00TY-9/RASC0N-37/6/1A.1D5+1-06/… |
| 160 | CD15DZELT/off/1144/2015 | CIMMYT | ST0RL0M/3/RASC0N-37/TARR0-2//RASC0N-37/4/D00003A/5/1A.1D5+1-06/3*M0J0/3/AJAIA-12/… |
| 161 | CD15DZELT/off/1152/2015 | CIMMYT | K0FA/9/USDA595/3/D67.3/RABI//CRA/4/AL0/5/HUI/YAV-1/6/ARDENT/7/HUI/YAV79/8/… |
| 162 | CD15DZELT/off/1159/2015 | CIMMYT | T.DIC0CC0NPI164578/10/K0FA/9/USDA595/3/D67.3/RABI//CRA/4/AL0/5/HUI/YAV-1/6/… |
| 163 | CD15DZELT/off/1164/2015 | CIMMYT | NASSIRA/10/PLATA10/6/MQUE/4/USDA573//QFN/AA-7/3/ALBA-D/5/AV0/HUI/7/PLATA-13/8/… |
| 164 | CD15DZELT/off/1176/2015 | CIMMYT | CHAM-3/4/N0K-23//PLATA-6/GREEN17/3/S0RA /2*PLATA-12//SRN-3/NIGRIS-4… |
| 165 | CD15DZELT/off/1193/2015 | CIMMYT | A624/5/S0RA/2*PLATA-12/3/S0RA/2*PLATA-12//S0MAT-3/4/AJAIA-13/YAZI//DIPPER-2/BUSHEN-3 |
| 166 | CD15DZELT/off/1516/2015 | CIMMYT | JUPARE C 2001*2/IM/5/K0FA/4/DUKEM1//PATKA -7/YAZI-1/3/PATKA-7/YAZI-1/6/ALAS/… |
| 167 | CD15DZELT/off/1244/2015 | CIMMYT | JUPAREC2001*2/IM/5/K0FA/4/DUKEM 1//PATKA-  7/YAZI-1/3/PATKA-7/YAZI-1/6/ALAS/… |
| 168 | CD15DZ-ELT/off/305/2015 | CIMMYT | G 122/2*AC089//2*UC1113/3/5 *K0FA/5/K0FA  /4/DUKEM-1//PATKA-7/YAZI-1/3/PATKA-7/… |
| 169 | Ude | DZARC | CHEN/ALTAR84//JO69 |
| 170 | Mangudo | DZARC | MRF1/STJ2|/3/1718/BT//KARIM,TUN |
| 171 | Tesfaye | DZARC | ARMENT//SRN-NIGRIS-4/3/CANED-9.1/4/TOSKA-26RASCON-37//SNITSN/5/PLAYERO |
| 172 | Alem tena | DZARC | Icasyr-1/3/Gcn//Sti/Mrb3 |
| 173 | Mukiye | DZARC | STJ3//BICRE/LOUKOS-4/3/TER3 |
| 174 | Yerer | DZARC | CHEN/TEZONTLE/3/GUILLEMOT//CANDEAL-II |
| 175 | D-2018 | DZARC | CGS |
| 176 | Utuba | DZARC | Icajihan42) Omruf1/Stojocri2/3/1718/BeadWheat24//Karim |
| 177 | Werer | DZARC | 1346/LAHN//BICRE/LOUKOS-4 |
| 178 | Asasa | DZARC | CHORLITO/YAVAROS//FREE-GALLIPOLI/3/FREE-GALLIPOLI/CANADIAN-RED/4/FREE-GALLIPOLI/DON-PEDRO/5/HUITLE |
| 179 | Cocorit 71 | DZARC | RASPINEGRO-DE-AGUILAS ENANO/4*TEHUACAN-60//STEWART-63/3/ANHINGA |
| 180 | Dire | DZARC | CHEN/TE3/BUSHEN4/3/ |
| 181 | Tate | DZARC | CD94523 |
| 182 | Toltu | DZARC | 4/B/R9096#21001(980SN Patho) |
| 183 | Bulalla | DZARC | DurumICARDA/Ethiopia |
| 184 | Hitosa | DZARC | CHEN/ALTAR-84 |
| 185 | Obsa | DZARC | ALTAR84/ALTO-1/AJAYA |
| 186 | Bakalcha | DZARC | 980SN Gedirfa/Gwerou #15 patho |
| 187 | Selam | DZARC | GERARDO/3/ND-61-130/LEEDS//COCORIT-71/4/HORA/5/HORA//COCORIT-71/CANDEAL |
| 188 | Malefia | DZARC | ALTAR-84/STERNA,MEX/LAHN |
| 189 | Breeding pipleline, DWNL p#2 | DZARC | C F4 20 S/4/YAZI-1/AKAKI-4//SOMAT-3/3/AUK/GUIL//GREEN/5/CANELO-9.1//SHAKE-3/… |
| 190 | Breeding pipleline, DWNL p#5 | DZARC | Yerer/UC11132….25Yellow/DZ2013mehF1 P#6/DZ2014meh F2 P#6-1 |
| 191 | Breeding pipleline, DWNL p#13 | DZARC | JUPARE C 2001*2/IM/5/K0FA/4/DUKEM-1//PATKA-7/YAZI-1/3/PATKA-7/YAZI-1/6/ALAS/… |
| 192 | Breeding pipleline, DWNL p#15 | DZARC | AG 1-22/2*AC089//2*UC1113/3/5*K0FA/5/K0FA/4/DUKEM-1//PATKA-7/YAZI-1/3/PATKA-7/… |
| 193 | Breeding pipleline, DWNL p#16 | DZARC | BHA/15/MOHAWK/4/DUKEM-1//PATKA-7/YAZI-1/3/PATKA-7/YAZI-1/6/CF4 20S/4/YAZI-1/… |
| 194 | Breeding pipleline, DWNL p#18 | DZARC | JUPARE C 2001* 2/RBC/5/MOHAWK/3/GUANAY//TILD-1LDTUS-4/4/ARMENT //SRN- 3/… |
| 195 | Breeding pipleline, DWNL p#20 | DZARC | ALTAR 84/STINT//SILVER-45/3/GUANAY/4/GREEN-14//YAV-10/AUK/10/CMH79.959/CHEN//… |
| 196 | Breeding pipleline, DWNL p#21 | DZARC | Icasyr-1/3/Gcn//Sti/Mrb3 |
| 197 | Breeding pipleline, DWNE P#4 | DZARC | Yerer/UC11132….25Yellow/DZ2013mehF1 P#6/DZ2014meh F2 P#6-1 |
| 198 | Breeding pipleline, DWNE P#5 | DZARC | Yerer/UC 1113GPC Lr 1908001/59/ DZ 2013mehF1P#7/DZ 2014 mehF2 P#7-1 |
| 199 | Breeding pipleline, DWNE P#6 | DZARC | Yerer/UC 1113GPC Lr 1908001/59/ DZ 2013mehF1P#7/DZ 2014 mehF2 P#7-2 |
| 200 | Breeding pipleline, DWNE P#13 | DZARC | otb4/3/HFN94N-8/Mrb5//Zna-1/4/5+j3//Dra2/Bcr/3/Ter-3 |

Table S2 Mean grain and biomass yield of genotypes under optimum and low N conditions and reduction due to N stress

| Genotype | GY under low N | GY under optimum N | Reduction in GY % | BM under low N | BM under optimum N | Reduction in BM % |
| --- | --- | --- | --- | --- | --- | --- |
| 1 | 3.35 | 1.83 | 45.27 | 5.33 | 10.08 | 47.11 |
| 2 | 4.00 | 1.45 | 63.75 | 7.83 | 11.33 | 30.88 |
| 3 | 3.63 | 1.47 | 59.63 | 4.83 | 8.67 | 44.23 |
| 4 | 3.25 | 1.58 | 51.28 | 5.50 | 11.42 | 51.82 |
| 5 | 4.28 | 2.32 | 45.91 | 4.67 | 8.42 | 44.55 |
| 6 | 2.07 | 0.92 | 55.65 | 6.58 | 8.58 | 23.30 |
| 7 | 3.58 | 1.95 | 45.58 | 6.00 | 10.00 | 40.00 |
| 8 | 3.17 | 2.00 | 36.84 | 6.58 | 9.08 | 27.52 |
| 9 | 4.10 | 2.18 | 46.75 | 6.30 | 11.17 | 43.58 |
| 10 | 4.83 | 2.27 | 53.10 | 4.75 | 9.83 | 51.69 |
| 11 | 4.15 | 1.75 | 57.83 | 5.00 | 9.58 | 47.83 |
| 12 | 3.58 | 2.02 | 43.72 | 5.98 | 10.25 | 41.63 |
| 13 | 3.50 | 1.90 | 45.71 | 5.33 | 8.33 | 36.00 |
| 14 | 3.68 | 2.63 | 28.51 | 5.08 | 10.25 | 50.41 |
| 15 | 3.57 | 1.88 | 47.20 | 6.42 | 10.67 | 39.84 |
| 16 | 4.63 | 1.48 | 67.99 | 6.83 | 11.75 | 41.84 |
| 17 | 3.23 | 2.27 | 29.90 | 4.67 | 10.58 | 55.91 |
| 18 | 4.15 | 2.02 | 51.41 | 6.92 | 11.67 | 40.71 |
| 19 | 3.42 | 1.75 | 48.78 | 6.50 | 9.33 | 30.36 |
| 20 | 3.95 | 2.12 | 46.41 | 6.58 | 10.75 | 38.76 |
| 21 | 3.73 | 2.08 | 44.20 | 6.08 | 10.83 | 43.85 |
| 22 | 3.60 | 1.07 | 70.37 | 6.33 | 10.75 | 41.09 |
| 23 | 4.20 | 1.85 | 55.95 | 5.08 | 10.58 | 51.97 |
| 24 | 3.47 | 2.08 | 39.90 | 6.42 | 12.17 | 47.26 |
| 25 | 2.73 | 1.78 | 34.76 | 5.33 | 9.67 | 44.83 |
| 26 | 3.63 | 1.98 | 45.41 | 5.83 | 9.83 | 40.68 |
| 27 | 4.65 | 2.67 | 42.65 | 6.58 | 9.83 | 33.05 |
| 28 | 4.20 | 2.13 | 49.21 | 6.93 | 12.67 | 45.26 |
| 29 | 3.38 | 1.25 | 63.05 | 5.08 | 10.75 | 52.71 |
| 30 | 4.37 | 2.45 | 43.89 | 5.83 | 9.33 | 37.50 |
| 31 | 2.67 | 1.43 | 46.25 | 5.17 | 9.42 | 45.13 |
| 32 | 3.70 | 2.02 | 45.50 | 5.87 | 9.92 | 40.84 |
| 33 | 4.12 | 2.22 | 46.15 | 6.17 | 10.58 | 41.73 |
| 34 | 3.68 | 1.77 | 52.04 | 6.08 | 10.58 | 42.52 |
| 35 | 4.13 | 1.63 | 60.48 | 6.33 | 11.25 | 43.70 |
| 36 | 4.28 | 1.93 | 54.86 | 6.50 | 11.92 | 45.45 |
| 37 | 3.22 | 1.72 | 46.63 | 5.50 | 9.08 | 39.45 |
| 38 | 3.53 | 1.67 | 52.83 | 6.50 | 10.50 | 38.10 |
| 39 | 2.83 | 1.77 | 37.65 | 5.83 | 10.58 | 44.88 |
| 40 | 4.00 | 1.90 | 52.50 | 6.33 | 10.08 | 37.19 |
| 41 | 4.08 | 1.70 | 58.37 | 6.72 | 12.58 | 46.62 |
| 42 | 4.08 | 1.67 | 59.18 | 5.33 | 10.83 | 50.77 |
| 43 | 3.73 | 1.87 | 50.00 | 5.08 | 10.33 | 50.81 |
| 44 | 3.97 | 1.78 | 55.04 | 6.67 | 11.83 | 43.66 |
| 45 | 4.22 | 2.50 | 40.71 | 6.33 | 9.00 | 29.63 |
| 46 | 3.92 | 1.90 | 51.49 | 7.00 | 11.33 | 38.24 |
| 47 | 2.97 | 1.32 | 55.62 | 4.75 | 9.67 | 50.86 |
| 48 | 3.65 | 2.18 | 40.18 | 6.00 | 12.42 | 51.68 |
| 49 | 4.05 | 2.27 | 44.03 | 6.67 | 11.67 | 42.86 |
| 50 | 3.73 | 2.07 | 44.64 | 5.08 | 9.83 | 48.31 |
| 51 | 4.10 | 1.83 | 55.28 | 6.50 | 9.83 | 33.90 |
| 52 | 3.80 | 2.12 | 44.30 | 4.33 | 9.17 | 52.73 |
| 53 | 3.53 | 1.90 | 46.23 | 6.33 | 10.00 | 36.67 |
| 54 | 3.60 | 1.68 | 53.24 | 6.08 | 10.00 | 39.17 |
| 55 | 3.78 | 2.58 | 31.72 | 5.33 | 10.75 | 50.39 |
| 56 | 3.70 | 1.83 | 50.45 | 5.50 | 8.83 | 37.74 |
| 57 | 3.45 | 2.40 | 30.43 | 7.03 | 11.00 | 36.06 |
| 58 | 3.37 | 1.53 | 54.46 | 6.42 | 9.92 | 35.29 |
| 59 | 2.88 | 1.70 | 41.04 | 6.67 | 11.33 | 41.18 |
| 60 | 3.77 | 1.87 | 50.44 | 5.75 | 11.58 | 50.36 |
| 61 | 3.83 | 2.17 | 43.48 | 5.17 | 9.58 | 46.09 |
| 62 | 4.02 | 2.08 | 48.13 | 6.33 | 11.33 | 44.12 |
| 63 | 3.83 | 1.60 | 58.26 | 6.58 | 9.67 | 31.90 |
| 64 | 3.82 | 2.08 | 45.41 | 5.83 | 10.00 | 41.67 |
| 65 | 3.90 | 1.85 | 52.56 | 5.92 | 12.58 | 52.98 |
| 66 | 3.95 | 1.82 | 54.01 | 4.75 | 10.83 | 56.15 |
| 67 | 3.67 | 1.85 | 49.55 | 5.55 | 9.42 | 41.06 |
| 68 | 3.83 | 1.62 | 57.83 | 6.08 | 11.25 | 45.93 |
| 69 | 3.63 | 2.05 | 43.58 | 5.17 | 9.92 | 47.90 |
| 70 | 3.57 | 1.97 | 44.86 | 5.17 | 9.25 | 44.14 |
| 71 | 3.25 | 1.93 | 40.51 | 5.88 | 9.58 | 38.61 |
| 72 | 3.93 | 1.92 | 51.27 | 8.00 | 13.50 | 40.74 |
| 73 | 3.98 | 1.78 | 55.23 | 6.33 | 11.83 | 46.48 |
| 74 | 4.40 | 1.42 | 67.80 | 6.08 | 12.50 | 51.33 |
| 75 | 3.83 | 2.30 | 40.00 | 5.67 | 10.25 | 44.72 |
| 76 | 3.73 | 1.87 | 50.00 | 6.33 | 11.58 | 45.32 |
| 77 | 3.82 | 2.07 | 45.85 | 6.83 | 9.25 | 26.13 |
| 78 | 3.67 | 2.00 | 45.45 | 5.42 | 10.92 | 50.38 |
| 79 | 3.60 | 1.27 | 64.81 | 6.33 | 11.58 | 45.32 |
| 80 | 4.37 | 2.47 | 43.51 | 6.17 | 10.33 | 40.32 |
| 81 | 3.53 | 1.83 | 48.11 | 6.75 | 10.92 | 38.17 |
| 82 | 3.72 | 2.43 | 34.53 | 5.83 | 9.33 | 37.50 |
| 83 | 4.58 | 2.02 | 56.00 | 5.67 | 12.92 | 56.13 |
| 84 | 4.52 | 2.37 | 47.60 | 5.50 | 9.83 | 44.07 |
| 85 | 3.33 | 1.95 | 41.50 | 5.00 | 9.83 | 49.15 |
| 86 | 3.58 | 1.92 | 46.51 | 7.15 | 9.67 | 26.03 |
| 87 | 3.70 | 1.62 | 56.31 | 6.92 | 10.58 | 34.65 |
| 88 | 3.72 | 2.22 | 40.36 | 4.58 | 9.58 | 52.17 |
| 89 | 3.07 | 1.58 | 48.37 | 4.33 | 9.58 | 54.78 |
| 90 | 4.28 | 1.95 | 54.47 | 7.08 | 12.17 | 41.78 |
| 91 | 3.72 | 2.23 | 39.91 | 5.42 | 11.50 | 52.90 |
| 92 | 3.57 | 2.03 | 42.99 | 4.83 | 9.08 | 46.79 |
| 93 | 3.28 | 2.00 | 39.09 | 4.83 | 10.67 | 54.69 |
| 94 | 3.48 | 2.28 | 34.45 | 5.67 | 9.75 | 41.88 |
| 95 | 4.20 | 2.10 | 50.00 | 7.25 | 12.42 | 41.61 |
| 96 | 3.63 | 1.93 | 46.79 | 5.92 | 10.83 | 45.38 |
| 97 | 4.20 | 2.18 | 48.02 | 5.85 | 11.58 | 49.50 |
| 98 | 4.07 | 1.70 | 58.20 | 6.25 | 12.67 | 50.66 |
| 99 | 4.05 | 2.22 | 45.27 | 5.42 | 11.42 | 52.55 |
| 100 | 3.45 | 2.60 | 24.64 | 6.00 | 8.75 | 31.43 |
| 101 | 4.73 | 2.58 | 45.42 | 3.92 | 6.58 | 40.51 |
| 102 | 3.42 | 1.45 | 57.56 | 5.00 | 9.92 | 49.58 |
| 103 | 4.10 | 1.92 | 53.25 | 7.25 | 11.83 | 38.73 |
| 104 | 3.50 | 1.55 | 55.71 | 6.17 | 10.08 | 38.84 |
| 105 | 3.85 | 2.63 | 31.60 | 5.83 | 9.83 | 40.68 |
| 106 | 4.48 | 1.83 | 59.11 | 5.80 | 10.25 | 43.41 |
| 107 | 4.30 | 1.98 | 53.88 | 5.75 | 11.50 | 50.00 |
| 108 | 3.42 | 1.78 | 47.80 | 5.17 | 9.67 | 46.55 |
| 109 | 3.77 | 2.37 | 37.17 | 5.58 | 11.00 | 49.24 |
| 110 | 3.37 | 2.23 | 33.66 | 5.00 | 10.25 | 51.22 |
| 111 | 4.08 | 1.87 | 54.29 | 6.67 | 11.33 | 41.18 |
| 112 | 4.23 | 1.68 | 60.24 | 6.00 | 10.08 | 40.50 |
| 113 | 3.62 | 1.55 | 57.14 | 5.33 | 9.33 | 42.86 |
| 114 | 4.15 | 2.08 | 49.80 | 7.33 | 12.42 | 40.94 |
| 115 | 3.52 | 1.83 | 47.87 | 6.92 | 10.67 | 35.16 |
| 116 | 3.40 | 2.18 | 35.78 | 4.50 | 9.92 | 54.62 |
| 117 | 3.38 | 1.42 | 58.13 | 5.80 | 12.08 | 52.00 |
| 118 | 4.35 | 1.93 | 55.56 | 7.02 | 13.25 | 47.04 |
| 119 | 3.77 | 2.23 | 40.71 | 5.67 | 9.42 | 39.82 |
| 120 | 3.10 | 1.77 | 43.01 | 5.33 | 8.50 | 37.25 |
| 121 | 4.22 | 2.75 | 34.78 | 6.50 | 11.92 | 45.45 |
| 122 | 3.23 | 1.65 | 48.97 | 4.67 | 10.42 | 55.20 |
| 123 | 4.12 | 1.82 | 55.87 | 7.00 | 11.33 | 38.24 |
| 124 | 4.20 | 2.18 | 48.02 | 7.42 | 12.50 | 40.67 |
| 125 | 3.57 | 1.98 | 44.39 | 5.83 | 9.25 | 36.94 |
| 126 | 3.85 | 1.83 | 52.38 | 5.00 | 8.50 | 41.18 |
| 127 | 3.55 | 2.07 | 41.78 | 4.75 | 9.17 | 48.18 |
| 128 | 4.43 | 1.50 | 66.17 | 5.92 | 10.58 | 44.09 |
| 129 | 3.90 | 1.95 | 50.00 | 7.17 | 14.00 | 48.81 |
| 130 | 3.97 | 1.97 | 50.42 | 6.92 | 11.08 | 37.59 |
| 131 | 5.08 | 2.13 | 58.03 | 5.25 | 9.17 | 42.73 |
| 132 | 4.63 | 1.57 | 66.19 | 5.67 | 12.42 | 54.36 |
| 133 | 3.10 | 1.55 | 50.00 | 5.00 | 11.08 | 54.89 |
| 134 | 3.78 | 1.90 | 49.78 | 4.87 | 9.83 | 50.51 |
| 135 | 3.83 | 1.85 | 51.74 | 6.00 | 10.58 | 43.31 |
| 136 | 4.50 | 2.37 | 47.41 | 6.77 | 9.67 | 30.00 |
| 137 | 3.75 | 1.85 | 50.67 | 6.42 | 9.25 | 30.63 |
| 138 | 3.93 | 1.77 | 55.08 | 5.58 | 11.67 | 52.14 |
| 139 | 4.10 | 1.95 | 52.44 | 7.42 | 11.83 | 37.32 |
| 140 | 4.47 | 2.53 | 43.28 | 5.50 | 10.08 | 45.45 |
| 141 | 3.90 | 2.30 | 41.03 | 6.08 | 9.33 | 34.82 |
| 142 | 4.75 | 2.30 | 51.58 | 5.23 | 9.92 | 47.23 |
| 143 | 3.90 | 2.27 | 41.88 | 5.50 | 9.42 | 41.59 |
| 144 | 3.78 | 2.08 | 44.93 | 6.72 | 10.50 | 36.03 |
| 145 | 3.85 | 1.95 | 49.35 | 6.00 | 11.33 | 47.06 |
| 146 | 3.40 | 2.37 | 30.39 | 5.50 | 11.83 | 53.52 |
| 147 | 4.23 | 2.47 | 41.73 | 6.42 | 10.92 | 41.22 |
| 148 | 3.53 | 1.75 | 50.47 | 6.33 | 9.92 | 36.13 |
| 149 | 3.20 | 1.58 | 50.52 | 6.17 | 10.08 | 38.84 |
| 150 | 3.53 | 2.20 | 37.74 | 7.38 | 10.92 | 32.37 |
| 151 | 3.70 | 1.53 | 58.56 | 5.50 | 9.17 | 40.00 |
| 152 | 4.27 | 2.20 | 48.44 | 5.92 | 12.25 | 51.70 |
| 153 | 3.47 | 2.05 | 40.87 | 5.97 | 10.33 | 42.26 |
| 154 | 4.12 | 2.57 | 37.65 | 7.00 | 11.00 | 36.36 |
| 155 | 4.52 | 2.78 | 38.38 | 6.57 | 11.00 | 40.30 |
| 156 | 3.62 | 2.13 | 41.01 | 4.92 | 10.08 | 51.24 |
| 157 | 4.30 | 2.58 | 39.92 | 6.08 | 10.92 | 44.27 |
| 158 | 4.40 | 2.53 | 42.42 | 6.67 | 12.25 | 45.58 |
| 159 | 3.65 | 2.27 | 37.90 | 5.17 | 11.58 | 55.40 |
| 160 | 3.10 | 1.98 | 36.02 | 6.33 | 9.58 | 33.91 |
| 161 | 4.07 | 2.23 | 45.08 | 6.00 | 11.25 | 46.67 |
| 162 | 3.85 | 2.08 | 45.89 | 5.92 | 9.58 | 38.26 |
| 163 | 3.82 | 2.42 | 36.68 | 6.67 | 11.33 | 41.18 |
| 164 | 4.50 | 2.22 | 50.74 | 5.50 | 10.08 | 45.45 |
| 165 | 3.68 | 1.97 | 46.61 | 5.67 | 9.58 | 40.87 |
| 166 | 3.60 | 2.47 | 31.48 | 6.33 | 10.17 | 37.70 |
| 167 | 3.22 | 2.32 | 27.98 | 5.75 | 9.83 | 41.53 |
| 168 | 3.10 | 2.13 | 31.18 | 5.75 | 9.17 | 37.27 |
| 169 | 3.73 | 1.55 | 58.48 | 5.42 | 10.25 | 47.15 |
| 170 | 3.85 | 1.77 | 54.11 | 5.58 | 9.08 | 38.53 |
| 171 | 3.67 | 1.22 | 66.82 | 5.50 | 10.40 | 47.12 |
| 172 | 4.85 | 2.13 | 56.01 | 4.42 | 9.75 | 54.70 |
| 173 | 4.18 | 1.92 | 54.18 | 6.08 | 12.58 | 51.66 |
| 174 | 4.42 | 2.15 | 51.32 | 4.50 | 12.42 | 63.76 |
| 175 | 3.48 | 2.70 | 22.49 | 6.83 | 11.42 | 40.15 |
| 176 | 4.13 | 1.80 | 56.45 | 6.17 | 12.08 | 48.97 |
| 177 | 3.55 | 1.75 | 50.70 | 5.67 | 10.25 | 44.72 |
| 178 | 4.00 | 1.63 | 59.17 | 6.37 | 12.00 | 46.94 |
| 179 | 4.75 | 1.85 | 61.05 | 6.08 | 9.75 | 37.61 |
| 180 | 4.70 | 2.02 | 57.09 | 5.33 | 9.25 | 42.34 |
| 181 | 4.37 | 1.90 | 56.49 | 8.40 | 14.33 | 41.40 |
| 182 | 3.67 | 2.30 | 37.27 | 5.75 | 10.08 | 42.98 |
| 183 | 4.27 | 1.75 | 58.98 | 6.17 | 12.58 | 50.99 |
| 184 | 4.43 | 1.75 | 60.53 | 6.58 | 10.75 | 38.76 |
| 185 | 4.12 | 2.08 | 49.39 | 6.58 | 11.42 | 42.34 |
| 186 | 3.83 | 2.17 | 43.48 | 5.25 | 10.33 | 49.19 |
| 187 | 3.77 | 2.12 | 43.81 | 6.25 | 9.75 | 35.90 |
| 188 | 3.68 | 2.38 | 35.29 | 5.17 | 9.83 | 47.46 |
| 189 | 3.28 | 1.90 | 42.13 | 5.33 | 11.25 | 52.59 |
| 190 | 4.28 | 1.75 | 59.14 | 5.92 | 11.00 | 46.21 |
| 191 | 3.97 | 2.63 | 33.61 | 6.83 | 11.17 | 38.81 |
| 192 | 3.88 | 2.02 | 48.07 | 5.15 | 9.67 | 46.72 |
| 193 | 3.52 | 1.45 | 58.77 | 5.78 | 9.50 | 39.12 |
| 194 | 4.12 | 1.78 | 56.68 | 7.68 | 10.67 | 27.97 |
| 195 | 4.50 | 2.00 | 55.56 | 5.92 | 14.42 | 58.96 |
| 196 | 4.50 | 2.63 | 41.48 | 7.08 | 10.75 | 34.11 |
| 197 | 4.13 | 2.07 | 50.00 | 6.17 | 11.42 | 45.99 |
| 198 | 3.98 | 1.83 | 53.97 | 5.33 | 12.75 | 58.17 |
| 199 | 2.97 | 1.45 | 51.12 | 5.77 | 11.17 | 48.36 |
| 200 | 3.62 | 2.40 | 33.64 | 5.77 | 11.25 | 48.74 |

*GY=Grain yield and BM= Biomass yield*

Table S3 BLUP values for grain yield under Optimum and low N conditions and stress screening induces

| **Genotypes** | **Variables** | | | | | | | | | |
| --- | --- | --- | --- | --- | --- | --- | --- | --- | --- | --- |
| **Yns** | **Yst** | **SSI** | **STI** | **YSI** | **MP** | **TOL** | **RRS** | **YI** | **GMP** |
| 1 | 3.71 | 1.96 | 3.45 | 0.51 | 0.55 | 4.67 | 1.83 | 0.45 | 0.99 | 2.62 |
| 2 | 3.97 | 1.83 | 3.71 | 0.50 | 0.53 | 4.88 | 1.93 | 0.47 | 0.93 | 2.58 |
| 3 | 3.83 | 1.84 | 3.59 | 0.49 | 0.53 | 4.72 | 1.90 | 0.47 | 0.93 | 2.57 |
| 4 | 3.68 | 1.85 | 3.44 | 0.48 | 0.53 | 4.56 | 1.86 | 0.47 | 0.93 | 2.52 |
| 5 | 4.03 | 2.07 | 3.75 | 0.57 | 0.55 | 5.11 | 1.88 | 0.46 | 1.05 | 2.86 |
| 6 | 3.11 | 1.65 | 2.93 | 0.39 | 0.53 | 3.77 | 1.78 | 0.47 | 0.83 | 2.11 |
| 7 | 3.76 | 1.99 | 3.50 | 0.52 | 0.55 | 4.75 | 1.83 | 0.45 | 1.01 | 2.69 |
| 8 | 3.57 | 1.92 | 3.32 | 0.48 | 0.55 | 4.48 | 1.81 | 0.45 | 0.97 | 2.54 |
| 9 | 3.91 | 2.08 | 3.63 | 0.57 | 0.55 | 4.97 | 1.85 | 0.45 | 1.05 | 2.81 |
| 10 | 4.08 | 2.12 | 3.78 | 0.62 | 0.55 | 5.18 | 1.87 | 0.45 | 1.07 | 2.90 |
| 11 | 3.85 | 1.95 | 3.60 | 0.51 | 0.54 | 4.81 | 1.87 | 0.46 | 0.99 | 2.65 |
| 12 | 3.72 | 1.94 | 3.47 | 0.51 | 0.55 | 4.67 | 1.84 | 0.45 | 0.98 | 2.61 |
| 13 | 3.71 | 1.93 | 3.46 | 0.51 | 0.55 | 4.67 | 1.84 | 0.45 | 0.98 | 2.62 |
| 14 | 3.78 | 2.08 | 3.50 | 0.54 | 0.56 | 4.85 | 1.81 | 0.44 | 1.05 | 2.74 |
| 15 | 3.72 | 1.94 | 3.47 | 0.50 | 0.54 | 4.66 | 1.84 | 0.46 | 0.98 | 2.62 |
| 16 | 4.06 | 1.89 | 3.80 | 0.52 | 0.53 | 5.01 | 1.93 | 0.47 | 0.95 | 2.65 |
| 17 | 3.67 | 2.04 | 3.40 | 0.53 | 0.56 | 4.68 | 1.80 | 0.44 | 1.03 | 2.68 |
| 18 | 3.99 | 1.95 | 3.72 | 0.55 | 0.53 | 4.98 | 1.90 | 0.47 | 0.99 | 2.75 |
| 19 | 3.57 | 1.93 | 3.32 | 0.47 | 0.56 | 4.48 | 1.81 | 0.44 | 0.97 | 2.52 |
| 20 | 3.91 | 2.00 | 3.64 | 0.55 | 0.54 | 4.93 | 1.87 | 0.46 | 1.01 | 2.74 |
| 21 | 3.77 | 1.94 | 3.51 | 0.51 | 0.55 | 4.74 | 1.85 | 0.45 | 0.98 | 2.65 |
| 22 | 3.66 | 1.75 | 3.44 | 0.45 | 0.52 | 4.46 | 1.87 | 0.48 | 0.89 | 2.39 |
| 23 | 3.92 | 1.96 | 3.66 | 0.53 | 0.54 | 4.91 | 1.88 | 0.46 | 0.99 | 2.71 |
| 24 | 3.70 | 2.01 | 3.44 | 0.52 | 0.56 | 4.69 | 1.81 | 0.44 | 1.02 | 2.66 |
| 25 | 3.50 | 1.95 | 3.25 | 0.49 | 0.57 | 4.43 | 1.79 | 0.43 | 0.98 | 2.53 |
| 26 | 3.69 | 1.93 | 3.43 | 0.49 | 0.55 | 4.62 | 1.83 | 0.45 | 0.98 | 2.58 |
| 27 | 4.15 | 2.11 | 3.86 | 0.63 | 0.54 | 5.29 | 1.89 | 0.46 | 1.07 | 2.94 |
| 28 | 4.04 | 2.03 | 3.77 | 0.58 | 0.54 | 5.10 | 1.89 | 0.46 | 1.03 | 2.83 |
| 29 | 3.65 | 1.72 | 3.43 | 0.44 | 0.52 | 4.43 | 1.88 | 0.48 | 0.87 | 2.36 |
| 30 | 4.06 | 2.16 | 3.76 | 0.61 | 0.56 | 5.20 | 1.85 | 0.44 | 1.09 | 2.93 |
| 31 | 3.49 | 1.85 | 3.25 | 0.46 | 0.55 | 4.34 | 1.82 | 0.45 | 0.93 | 2.45 |
| 32 | 3.81 | 1.98 | 3.54 | 0.52 | 0.55 | 4.80 | 1.85 | 0.45 | 1.00 | 2.69 |
| 33 | 3.92 | 2.06 | 3.65 | 0.57 | 0.55 | 4.98 | 1.86 | 0.45 | 1.04 | 2.80 |
| 34 | 3.76 | 1.99 | 3.50 | 0.52 | 0.55 | 4.74 | 1.84 | 0.45 | 1.01 | 2.67 |
| 35 | 3.83 | 1.87 | 3.58 | 0.48 | 0.54 | 4.74 | 1.88 | 0.47 | 0.94 | 2.57 |
| 36 | 3.91 | 1.99 | 3.65 | 0.53 | 0.54 | 4.90 | 1.87 | 0.46 | 1.00 | 2.72 |
| 37 | 3.61 | 1.86 | 3.37 | 0.46 | 0.54 | 4.48 | 1.84 | 0.46 | 0.94 | 2.47 |
| 38 | 3.73 | 1.83 | 3.49 | 0.47 | 0.53 | 4.60 | 1.87 | 0.47 | 0.92 | 2.52 |
| 39 | 3.50 | 1.91 | 3.24 | 0.47 | 0.57 | 4.39 | 1.80 | 0.43 | 0.96 | 2.48 |
| 40 | 3.86 | 1.92 | 3.61 | 0.53 | 0.53 | 4.81 | 1.88 | 0.47 | 0.97 | 2.62 |
| 41 | 3.91 | 1.95 | 3.65 | 0.53 | 0.54 | 4.89 | 1.88 | 0.46 | 0.99 | 2.68 |
| 42 | 3.91 | 1.86 | 3.66 | 0.50 | 0.53 | 4.82 | 1.91 | 0.47 | 0.94 | 2.60 |
| 43 | 3.76 | 1.99 | 3.51 | 0.52 | 0.55 | 4.74 | 1.84 | 0.45 | 1.00 | 2.67 |
| 44 | 3.82 | 1.97 | 3.56 | 0.52 | 0.55 | 4.79 | 1.85 | 0.45 | 1.00 | 2.67 |
| 45 | 4.04 | 2.11 | 3.75 | 0.60 | 0.55 | 5.16 | 1.87 | 0.45 | 1.07 | 2.91 |
| 46 | 3.79 | 2.00 | 3.53 | 0.52 | 0.55 | 4.78 | 1.84 | 0.45 | 1.01 | 2.68 |
| 47 | 3.57 | 1.82 | 3.35 | 0.48 | 0.53 | 4.42 | 1.84 | 0.47 | 0.92 | 2.48 |
| 48 | 3.68 | 2.04 | 3.42 | 0.51 | 0.56 | 4.68 | 1.80 | 0.44 | 1.03 | 2.65 |
| 49 | 3.91 | 2.07 | 3.62 | 0.56 | 0.55 | 4.97 | 1.85 | 0.45 | 1.04 | 2.79 |
| 50 | 3.82 | 2.05 | 3.55 | 0.55 | 0.55 | 4.86 | 1.84 | 0.45 | 1.04 | 2.75 |
| 51 | 3.89 | 1.93 | 3.63 | 0.51 | 0.54 | 4.85 | 1.88 | 0.46 | 0.98 | 2.67 |
| 52 | 3.83 | 2.05 | 3.55 | 0.55 | 0.55 | 4.87 | 1.83 | 0.45 | 1.04 | 2.75 |
| 53 | 3.81 | 1.97 | 3.55 | 0.53 | 0.54 | 4.79 | 1.86 | 0.46 | 1.00 | 2.68 |
| 54 | 3.71 | 1.90 | 3.46 | 0.48 | 0.55 | 4.62 | 1.84 | 0.45 | 0.96 | 2.57 |
| 55 | 3.84 | 2.11 | 3.55 | 0.57 | 0.56 | 4.93 | 1.82 | 0.44 | 1.07 | 2.81 |
| 56 | 3.78 | 1.86 | 3.53 | 0.48 | 0.53 | 4.68 | 1.88 | 0.47 | 0.94 | 2.56 |
| 57 | 3.72 | 2.07 | 3.45 | 0.54 | 0.56 | 4.77 | 1.81 | 0.44 | 1.05 | 2.72 |
| 58 | 3.70 | 1.79 | 3.47 | 0.46 | 0.52 | 4.55 | 1.88 | 0.48 | 0.90 | 2.49 |
| 59 | 3.56 | 1.86 | 3.32 | 0.47 | 0.54 | 4.43 | 1.83 | 0.46 | 0.94 | 2.48 |
| 60 | 3.90 | 1.90 | 3.66 | 0.52 | 0.52 | 4.86 | 1.90 | 0.48 | 0.96 | 2.67 |
| 61 | 3.86 | 1.99 | 3.59 | 0.53 | 0.54 | 4.87 | 1.86 | 0.46 | 1.01 | 2.68 |
| 62 | 3.87 | 1.96 | 3.61 | 0.52 | 0.54 | 4.85 | 1.87 | 0.46 | 0.99 | 2.71 |
| 63 | 3.82 | 1.90 | 3.56 | 0.50 | 0.54 | 4.74 | 1.87 | 0.46 | 0.96 | 2.58 |
| 64 | 3.89 | 1.99 | 3.62 | 0.55 | 0.54 | 4.90 | 1.87 | 0.46 | 1.00 | 2.74 |
| 65 | 3.78 | 1.92 | 3.53 | 0.50 | 0.54 | 4.71 | 1.86 | 0.46 | 0.97 | 2.61 |
| 66 | 3.90 | 1.93 | 3.65 | 0.53 | 0.53 | 4.86 | 1.89 | 0.47 | 0.97 | 2.68 |
| 67 | 3.74 | 1.92 | 3.49 | 0.50 | 0.54 | 4.68 | 1.85 | 0.46 | 0.97 | 2.60 |
| 68 | 3.80 | 1.96 | 3.54 | 0.51 | 0.55 | 4.75 | 1.85 | 0.45 | 0.99 | 2.65 |
| 69 | 3.73 | 2.08 | 3.46 | 0.55 | 0.56 | 4.76 | 1.81 | 0.44 | 1.05 | 2.74 |
| 70 | 3.72 | 1.91 | 3.47 | 0.50 | 0.54 | 4.66 | 1.85 | 0.46 | 0.97 | 2.60 |
| 71 | 3.68 | 1.98 | 3.42 | 0.51 | 0.56 | 4.65 | 1.82 | 0.44 | 1.00 | 2.62 |
| 72 | 3.95 | 1.92 | 3.69 | 0.53 | 0.53 | 4.93 | 1.90 | 0.47 | 0.97 | 2.69 |
| 73 | 3.98 | 1.95 | 3.72 | 0.54 | 0.53 | 4.98 | 1.90 | 0.47 | 0.99 | 2.73 |
| 74 | 3.93 | 1.84 | 3.68 | 0.49 | 0.53 | 4.82 | 1.91 | 0.47 | 0.93 | 2.56 |
| 75 | 3.79 | 2.08 | 3.51 | 0.55 | 0.56 | 4.83 | 1.81 | 0.44 | 1.05 | 2.74 |
| 76 | 3.88 | 1.97 | 3.62 | 0.53 | 0.54 | 4.87 | 1.88 | 0.46 | 0.99 | 2.71 |
| 77 | 3.78 | 1.96 | 3.52 | 0.51 | 0.55 | 4.75 | 1.85 | 0.45 | 0.99 | 2.62 |
| 78 | 3.77 | 1.95 | 3.51 | 0.51 | 0.54 | 4.73 | 1.85 | 0.46 | 0.99 | 2.65 |
| 79 | 3.74 | 1.77 | 3.51 | 0.46 | 0.52 | 4.57 | 1.89 | 0.48 | 0.90 | 2.46 |
| 80 | 4.06 | 2.09 | 3.78 | 0.59 | 0.54 | 5.16 | 1.88 | 0.46 | 1.06 | 2.87 |
| 81 | 3.71 | 1.95 | 3.44 | 0.54 | 0.55 | 4.66 | 1.83 | 0.45 | 0.99 | 2.62 |
| 82 | 3.78 | 2.13 | 3.50 | 0.57 | 0.57 | 4.87 | 1.80 | 0.43 | 1.08 | 2.79 |
| 83 | 4.03 | 2.00 | 3.75 | 0.56 | 0.54 | 5.06 | 1.89 | 0.46 | 1.01 | 2.79 |
| 84 | 3.99 | 2.12 | 3.70 | 0.59 | 0.55 | 5.09 | 1.85 | 0.45 | 1.07 | 2.87 |
| 85 | 3.68 | 1.94 | 3.43 | 0.50 | 0.55 | 4.62 | 1.83 | 0.45 | 0.98 | 2.59 |
| 86 | 3.78 | 1.90 | 3.53 | 0.50 | 0.54 | 4.72 | 1.87 | 0.46 | 0.96 | 2.60 |
| 87 | 3.83 | 1.83 | 3.58 | 0.49 | 0.53 | 4.73 | 1.90 | 0.47 | 0.93 | 2.56 |
| 88 | 3.85 | 2.03 | 3.58 | 0.55 | 0.55 | 4.89 | 1.85 | 0.45 | 1.03 | 2.77 |
| 89 | 3.63 | 1.91 | 3.39 | 0.50 | 0.54 | 4.54 | 1.84 | 0.46 | 0.97 | 2.57 |
| 90 | 4.02 | 2.02 | 3.74 | 0.55 | 0.55 | 5.06 | 1.89 | 0.45 | 1.02 | 2.78 |
| 91 | 3.82 | 2.04 | 3.55 | 0.55 | 0.55 | 4.86 | 1.84 | 0.45 | 1.03 | 2.75 |
| 92 | 3.79 | 2.03 | 3.53 | 0.55 | 0.55 | 4.81 | 1.84 | 0.45 | 1.03 | 2.71 |
| 93 | 3.49 | 2.03 | 3.23 | 0.50 | 0.57 | 4.46 | 1.76 | 0.43 | 1.03 | 2.60 |
| 94 | 3.71 | 2.03 | 3.44 | 0.53 | 0.56 | 4.72 | 1.82 | 0.44 | 1.02 | 2.67 |
| 95 | 3.95 | 2.03 | 3.67 | 0.57 | 0.54 | 4.99 | 1.87 | 0.46 | 1.03 | 2.79 |
| 96 | 3.72 | 1.96 | 3.46 | 0.51 | 0.55 | 4.68 | 1.83 | 0.45 | 0.99 | 2.63 |
| 97 | 3.95 | 2.03 | 3.68 | 0.57 | 0.55 | 4.99 | 1.87 | 0.45 | 1.02 | 2.77 |
| 98 | 3.95 | 1.90 | 3.69 | 0.51 | 0.53 | 4.90 | 1.90 | 0.47 | 0.96 | 2.64 |
| 99 | 3.90 | 2.04 | 3.63 | 0.57 | 0.55 | 4.95 | 1.85 | 0.45 | 1.03 | 2.77 |
| 100 | 3.78 | 2.11 | 3.49 | 0.56 | 0.58 | 4.87 | 1.81 | 0.42 | 1.07 | 2.74 |
| 101 | 4.09 | 2.18 | 3.80 | 0.65 | 0.55 | 5.25 | 1.85 | 0.45 | 1.10 | 2.96 |
| 102 | 3.65 | 1.81 | 3.42 | 0.46 | 0.53 | 4.50 | 1.86 | 0.47 | 0.91 | 2.47 |
| 103 | 3.92 | 1.95 | 3.66 | 0.53 | 0.54 | 4.90 | 1.88 | 0.46 | 0.99 | 2.68 |
| 104 | 3.67 | 1.84 | 3.42 | 0.47 | 0.54 | 4.54 | 1.85 | 0.46 | 0.93 | 2.50 |
| 105 | 3.90 | 2.17 | 3.61 | 0.60 | 0.56 | 5.04 | 1.82 | 0.44 | 1.10 | 2.88 |
| 106 | 4.05 | 1.90 | 3.78 | 0.53 | 0.53 | 5.01 | 1.92 | 0.47 | 0.96 | 2.69 |
| 107 | 3.98 | 2.01 | 3.71 | 0.56 | 0.54 | 5.02 | 1.88 | 0.46 | 1.01 | 2.78 |
| 108 | 3.76 | 1.95 | 3.52 | 0.52 | 0.54 | 4.73 | 1.85 | 0.46 | 0.99 | 2.66 |
| 109 | 3.80 | 2.05 | 3.53 | 0.56 | 0.55 | 4.83 | 1.83 | 0.45 | 1.04 | 2.75 |
| 110 | 3.67 | 2.02 | 3.40 | 0.54 | 0.56 | 4.67 | 1.81 | 0.44 | 1.02 | 2.64 |
| 111 | 3.92 | 1.99 | 3.65 | 0.54 | 0.54 | 4.93 | 1.87 | 0.46 | 1.01 | 2.75 |
| 112 | 4.03 | 1.97 | 3.76 | 0.54 | 0.54 | 5.04 | 1.90 | 0.46 | 1.00 | 2.74 |
| 113 | 3.75 | 1.93 | 3.50 | 0.51 | 0.54 | 4.69 | 1.85 | 0.46 | 0.98 | 2.62 |
| 114 | 3.94 | 2.10 | 3.66 | 0.59 | 0.55 | 5.02 | 1.85 | 0.45 | 1.06 | 2.82 |
| 115 | 3.63 | 1.96 | 3.39 | 0.52 | 0.55 | 4.56 | 1.81 | 0.45 | 0.99 | 2.58 |
| 116 | 3.71 | 2.07 | 3.44 | 0.56 | 0.56 | 4.75 | 1.80 | 0.44 | 1.05 | 2.70 |
| 117 | 3.66 | 1.89 | 3.42 | 0.49 | 0.54 | 4.55 | 1.84 | 0.46 | 0.95 | 2.55 |
| 118 | 3.97 | 1.98 | 3.71 | 0.56 | 0.53 | 4.97 | 1.88 | 0.47 | 1.00 | 2.75 |
| 119 | 3.77 | 2.02 | 3.50 | 0.54 | 0.55 | 4.78 | 1.83 | 0.45 | 1.02 | 2.72 |
| 120 | 3.56 | 1.83 | 3.31 | 0.45 | 0.55 | 4.41 | 1.83 | 0.45 | 0.92 | 2.45 |
| 121 | 3.98 | 2.16 | 3.69 | 0.60 | 0.56 | 5.13 | 1.84 | 0.44 | 1.09 | 2.91 |
| 122 | 3.70 | 1.85 | 3.46 | 0.48 | 0.53 | 4.59 | 1.87 | 0.47 | 0.93 | 2.51 |
| 123 | 3.98 | 1.98 | 3.71 | 0.54 | 0.54 | 4.97 | 1.89 | 0.46 | 1.00 | 2.73 |
| 124 | 4.02 | 1.98 | 3.74 | 0.54 | 0.54 | 5.04 | 1.90 | 0.46 | 1.00 | 2.74 |
| 125 | 3.77 | 2.01 | 3.51 | 0.54 | 0.55 | 4.77 | 1.84 | 0.45 | 1.02 | 2.70 |
| 126 | 3.85 | 1.88 | 3.60 | 0.50 | 0.53 | 4.77 | 1.89 | 0.47 | 0.95 | 2.62 |
| 127 | 3.78 | 1.98 | 3.52 | 0.53 | 0.55 | 4.78 | 1.85 | 0.45 | 1.00 | 2.69 |
| 128 | 3.99 | 1.87 | 3.73 | 0.51 | 0.53 | 4.91 | 1.92 | 0.47 | 0.95 | 2.63 |
| 129 | 3.73 | 1.95 | 3.46 | 0.50 | 0.55 | 4.67 | 1.84 | 0.45 | 0.99 | 2.61 |
| 130 | 3.96 | 1.97 | 3.69 | 0.54 | 0.54 | 4.97 | 1.89 | 0.46 | 1.00 | 2.72 |
| 131 | 4.23 | 2.07 | 3.94 | 0.61 | 0.54 | 5.33 | 1.92 | 0.46 | 1.05 | 2.91 |
| 132 | 4.07 | 1.89 | 3.80 | 0.52 | 0.53 | 5.02 | 1.93 | 0.47 | 0.95 | 2.66 |
| 133 | 3.64 | 1.88 | 3.40 | 0.49 | 0.54 | 4.54 | 1.84 | 0.46 | 0.95 | 2.54 |
| 134 | 3.84 | 1.98 | 3.58 | 0.54 | 0.54 | 4.83 | 1.86 | 0.46 | 1.00 | 2.70 |
| 135 | 3.79 | 1.97 | 3.54 | 0.52 | 0.54 | 4.75 | 1.85 | 0.46 | 0.99 | 2.66 |
| 136 | 4.08 | 2.07 | 3.80 | 0.59 | 0.55 | 5.18 | 1.89 | 0.45 | 1.05 | 2.85 |
| 137 | 3.83 | 1.92 | 3.58 | 0.52 | 0.54 | 4.78 | 1.87 | 0.46 | 0.97 | 2.65 |
| 138 | 3.82 | 2.01 | 3.55 | 0.53 | 0.55 | 4.80 | 1.84 | 0.45 | 1.01 | 2.70 |
| 139 | 3.95 | 1.94 | 3.69 | 0.53 | 0.53 | 4.94 | 1.90 | 0.47 | 0.98 | 2.72 |
| 140 | 4.10 | 2.17 | 3.79 | 0.63 | 0.56 | 5.26 | 1.86 | 0.44 | 1.10 | 2.96 |
| 141 | 3.86 | 2.05 | 3.59 | 0.58 | 0.55 | 4.91 | 1.84 | 0.46 | 1.04 | 2.76 |
| 142 | 4.20 | 2.11 | 3.90 | 0.61 | 0.55 | 5.33 | 1.90 | 0.45 | 1.07 | 2.95 |
| 143 | 3.86 | 2.02 | 3.59 | 0.55 | 0.55 | 4.89 | 1.85 | 0.45 | 1.02 | 2.74 |
| 144 | 3.89 | 2.05 | 3.61 | 0.56 | 0.55 | 4.94 | 1.86 | 0.45 | 1.04 | 2.79 |
| 145 | 3.78 | 2.00 | 3.51 | 0.52 | 0.55 | 4.77 | 1.83 | 0.45 | 1.01 | 2.69 |
| 146 | 3.72 | 2.10 | 3.44 | 0.55 | 0.57 | 4.78 | 1.80 | 0.43 | 1.06 | 2.75 |
| 147 | 3.96 | 2.16 | 3.67 | 0.60 | 0.56 | 5.10 | 1.83 | 0.44 | 1.09 | 2.91 |
| 148 | 3.74 | 1.91 | 3.49 | 0.50 | 0.54 | 4.66 | 1.86 | 0.46 | 0.96 | 2.60 |
| 149 | 3.65 | 1.88 | 3.40 | 0.48 | 0.55 | 4.55 | 1.84 | 0.45 | 0.95 | 2.52 |
| 150 | 3.71 | 2.00 | 3.44 | 0.51 | 0.56 | 4.70 | 1.82 | 0.44 | 1.01 | 2.63 |
| 151 | 3.81 | 1.82 | 3.57 | 0.48 | 0.53 | 4.68 | 1.89 | 0.47 | 0.92 | 2.53 |
| 152 | 4.03 | 1.99 | 3.75 | 0.57 | 0.54 | 5.06 | 1.90 | 0.46 | 1.01 | 2.79 |
| 153 | 3.72 | 2.01 | 3.45 | 0.52 | 0.56 | 4.71 | 1.82 | 0.44 | 1.02 | 2.68 |
| 154 | 3.93 | 2.18 | 3.64 | 0.62 | 0.56 | 5.08 | 1.82 | 0.44 | 1.10 | 2.93 |
| 155 | 4.02 | 2.22 | 3.72 | 0.64 | 0.57 | 5.19 | 1.83 | 0.43 | 1.12 | 2.96 |
| 156 | 3.83 | 2.08 | 3.55 | 0.56 | 0.56 | 4.89 | 1.83 | 0.44 | 1.05 | 2.80 |
| 157 | 4.06 | 2.13 | 3.77 | 0.61 | 0.55 | 5.19 | 1.87 | 0.45 | 1.08 | 2.92 |
| 158 | 4.00 | 2.11 | 3.71 | 0.60 | 0.55 | 5.11 | 1.85 | 0.45 | 1.06 | 2.85 |
| 159 | 3.80 | 2.09 | 3.51 | 0.55 | 0.57 | 4.86 | 1.82 | 0.43 | 1.06 | 2.78 |
| 160 | 3.63 | 1.91 | 3.36 | 0.49 | 0.56 | 4.56 | 1.83 | 0.44 | 0.97 | 2.54 |
| 161 | 3.99 | 2.08 | 3.71 | 0.58 | 0.55 | 5.08 | 1.87 | 0.45 | 1.05 | 2.84 |
| 162 | 3.87 | 2.02 | 3.59 | 0.55 | 0.55 | 4.88 | 1.85 | 0.45 | 1.02 | 2.73 |
| 163 | 3.84 | 2.08 | 3.53 | 0.53 | 0.58 | 4.91 | 1.82 | 0.42 | 1.05 | 2.74 |
| 164 | 4.02 | 2.09 | 3.73 | 0.59 | 0.55 | 5.10 | 1.87 | 0.45 | 1.06 | 2.86 |
| 165 | 3.75 | 1.91 | 3.49 | 0.50 | 0.55 | 4.68 | 1.85 | 0.45 | 0.97 | 2.59 |
| 166 | 3.77 | 2.06 | 3.49 | 0.54 | 0.56 | 4.81 | 1.82 | 0.44 | 1.04 | 2.72 |
| 167 | 3.64 | 2.04 | 3.37 | 0.52 | 0.57 | 4.65 | 1.80 | 0.43 | 1.03 | 2.65 |
| 168 | 3.65 | 1.96 | 3.39 | 0.50 | 0.56 | 4.61 | 1.82 | 0.44 | 0.99 | 2.60 |
| 169 | 3.74 | 1.89 | 3.50 | 0.51 | 0.53 | 4.64 | 1.86 | 0.47 | 0.95 | 2.55 |
| 170 | 3.85 | 1.98 | 3.59 | 0.54 | 0.54 | 4.85 | 1.86 | 0.46 | 1.00 | 2.71 |
| 171 | 3.75 | 1.82 | 3.52 | 0.48 | 0.53 | 4.61 | 1.88 | 0.47 | 0.92 | 2.50 |
| 172 | 4.11 | 2.06 | 3.82 | 0.57 | 0.54 | 5.18 | 1.89 | 0.46 | 1.04 | 2.82 |
| 173 | 3.89 | 1.99 | 3.63 | 0.55 | 0.54 | 4.89 | 1.86 | 0.46 | 1.01 | 2.71 |
| 174 | 4.03 | 2.04 | 3.75 | 0.57 | 0.54 | 5.09 | 1.88 | 0.46 | 1.03 | 2.82 |
| 175 | 3.74 | 2.18 | 3.42 | 0.57 | 0.60 | 4.87 | 1.78 | 0.40 | 1.10 | 2.78 |
| 176 | 3.89 | 1.96 | 3.63 | 0.53 | 0.54 | 4.86 | 1.87 | 0.46 | 0.99 | 2.70 |
| 177 | 3.81 | 1.88 | 3.56 | 0.49 | 0.53 | 4.74 | 1.88 | 0.47 | 0.95 | 2.57 |
| 178 | 3.93 | 1.87 | 3.68 | 0.50 | 0.53 | 4.87 | 1.91 | 0.47 | 0.95 | 2.62 |
| 179 | 4.07 | 1.98 | 3.79 | 0.56 | 0.54 | 5.07 | 1.90 | 0.46 | 1.00 | 2.77 |
| 180 | 4.10 | 2.00 | 3.82 | 0.57 | 0.53 | 5.14 | 1.91 | 0.47 | 1.01 | 2.78 |
| 181 | 3.96 | 2.01 | 3.69 | 0.55 | 0.55 | 4.98 | 1.87 | 0.45 | 1.02 | 2.76 |
| 182 | 3.82 | 2.00 | 3.55 | 0.54 | 0.55 | 4.84 | 1.85 | 0.45 | 1.01 | 2.72 |
| 183 | 3.90 | 1.98 | 3.63 | 0.53 | 0.55 | 4.89 | 1.86 | 0.45 | 1.00 | 2.70 |
| 184 | 4.10 | 1.96 | 3.83 | 0.56 | 0.53 | 5.12 | 1.92 | 0.47 | 0.99 | 2.79 |
| 185 | 3.96 | 1.98 | 3.70 | 0.55 | 0.54 | 4.97 | 1.89 | 0.46 | 1.00 | 2.74 |
| 186 | 3.83 | 2.03 | 3.56 | 0.55 | 0.55 | 4.85 | 1.84 | 0.45 | 1.03 | 2.73 |
| 187 | 3.87 | 2.03 | 3.59 | 0.54 | 0.55 | 4.90 | 1.85 | 0.45 | 1.03 | 2.74 |
| 188 | 3.84 | 2.07 | 3.57 | 0.56 | 0.55 | 4.90 | 1.83 | 0.45 | 1.05 | 2.79 |
| 189 | 3.64 | 1.98 | 3.38 | 0.51 | 0.56 | 4.59 | 1.82 | 0.44 | 1.00 | 2.62 |
| 190 | 4.01 | 1.93 | 3.74 | 0.53 | 0.54 | 4.99 | 1.91 | 0.46 | 0.98 | 2.70 |
| 191 | 3.93 | 2.19 | 3.62 | 0.58 | 0.58 | 5.08 | 1.82 | 0.42 | 1.11 | 2.87 |
| 192 | 3.86 | 1.91 | 3.61 | 0.51 | 0.53 | 4.82 | 1.88 | 0.47 | 0.97 | 2.65 |
| 193 | 3.74 | 1.83 | 3.50 | 0.48 | 0.53 | 4.61 | 1.87 | 0.47 | 0.93 | 2.51 |
| 194 | 3.90 | 1.97 | 3.64 | 0.53 | 0.54 | 4.88 | 1.88 | 0.46 | 0.99 | 2.71 |
| 195 | 4.09 | 1.94 | 3.82 | 0.57 | 0.52 | 5.09 | 1.92 | 0.48 | 0.98 | 2.77 |
| 196 | 4.02 | 2.16 | 3.73 | 0.61 | 0.56 | 5.16 | 1.85 | 0.44 | 1.09 | 2.92 |
| 197 | 3.97 | 1.99 | 3.68 | 0.53 | 0.55 | 4.99 | 1.88 | 0.45 | 1.01 | 2.71 |
| 198 | 3.87 | 1.96 | 3.61 | 0.54 | 0.54 | 4.85 | 1.87 | 0.46 | 0.99 | 2.69 |
| 199 | 3.53 | 1.79 | 3.30 | 0.45 | 0.54 | 4.35 | 1.84 | 0.46 | 0.90 | 2.41 |
| 200 | 3.80 | 2.03 | 3.53 | 0.55 | 0.55 | 4.84 | 1.83 | 0.45 | 1.03 | 2.73 |
| Grand Mean | 3.83 | 1.98 | 3.57 | 0.53 | 0.55 | 4.82 | 1.86 | 0.45 | 1.00 | 2.69 |
| LSD | 0.57 | 0.41 | 0.57 | 0.17 | 0.09 | 0.71 | 0.30 | 0.09 | 0.21 | 0.44 |
| CV | 18.30 | 25.22 | 21.17 | 36.14 | 34.25 | 15.63 | 45.45 | 41.12 | 25.21 | 16.25 |

*Yns and Yst: grain yield under high and low N respectively, SSI: stress susceptibility index, STI: stress tolerance index, YSI: yield stability index, MP: mean productivity, TOL: tolerance index, RRS: relative reduction due to stress, YI: yield index, GMP: geometric mean productivity index.*

Table S4 Correlation coefficient upper diagonal (P values for significance level) and lower diagonal (correlation values) for grain yield and stress screening induces

*Yns and Yst: grain yield under optimum and low N respectively, SSI: stress susceptibility index, STI: stress tolerance index, YSI: yield stability index, MP: mean productivity, TOL: tolerance index, RRS: relative reduction due to stress, YI: yield index, GMP: geometric mean productivity index.*

Table S5 Phenotypic correlation coefficient of 200 durum wheat genotypes' phenological, yield and its components, and physiological traits under Optimum N (upper diagonal) and low N (lower diagonal) conditions

| Traits | DH | DM | PH | NFT | SL | SPS | NSPS | BM | GY | HI | NDVI |
| --- | --- | --- | --- | --- | --- | --- | --- | --- | --- | --- | --- |
| DH | 1 | 0.85** | 0.47** | 0.42** | 0.58** | 0.37** | -0.61** | 0.49** | -0.17** | -0.65** | 0.46** |
| DM | 0.94** | 1 | 0.37** | 0.21** | 0.36** | 0.33** | -0.37** | 0.39** | -0.1ns | -0.47** | 0.31** |
| PH | 0.48** | 0.5** | 1 | 0.55** | 0.7** | 0.44** | -0.65** | 0.48** | -0.13ns | -0.58** | 0.62** |
| NFT | 0.61** | 0.59** | 0.47** | 1 | 0.62** | 0.15* | -0.71** | 0.57** | 0.04ns | -0.49** | 0.54** |
| SL | 0.7** | 0.65** | 0.63** | 0.67** | 1 | 0.59** | -0.65** | 0.57** | -0.07ns | -0.62** | 0.63** |
| SPS | 0.49** | 0.47** | 0.47** | 0.42** | 0.65** | 1 | -0.03** | 0.32** | -0.01ns | -0.33** | 0.38** |
| NSPS | -0.69** | -0.66** | -0.56** | -0.61** | -0.66** | -0.13ns | 1 | -0.49** | 0.18** | 0.66** | -0.57** |
| BM | 0.41** | 0.45** | 0.35** | 0.52** | 0.4** | 0.23** | -0.41** | 1 | 0.56** | -0.37** | 0.80** |
| GY | -0.26** | -0.2** | -0.14ns | 0.05ns | -0.13ns | -0.07ns | 0.19** | 0.62** | 1 | 0.51** | 0.32** |
| HI | -0.73** | -0.67** | -0.46** | -0.36** | -0.51** | -0.29** | 0.6** | -0.09ns | 0.69** | 1 | -0.41** |
| NDVI | 0.45** | 0.45** | 0.47** | 0.51** | 0.52** | 0.32** | -0.47** | 0.61** | 0.29** | -0.17* | 1 |

**, ** and ***: Significant at the probability level of P< 0.05, 0.01 and 0.001, respectively, DH: days to heading, DM: days to 90% physiological maturity, PH: plant height, NFT: number of fertile tillers/plant, SL: spike length, SPS: number of spikelet per spike, NSPS: number of seed per spike, BM: biomass yield (t/ha), GY: grain yield (t/ha), HI: harvest index and NDVI: normalized difference vegetative index.*

Table S 6. Combined analysis of variance for grain yields, yield components and other traits in 200 durum wheat genotypes grown under optimum and low N conditions

| Traits | N treatment | Variances by source of variation | | | Grand mean | LSD (0.05) | CV (%) |
| --- | --- | --- | --- | --- | --- | --- | --- |
| Genotypes | Genotype x Location | Residual/Error |
| Days to heading | Low | 33.31** | 1.45** | 6.99 | 75.92 | 3.74 | 3.48 |
| Optimum | 20.23** | 1.21** | 2.9 | 71.6 | 2.68 | 2.38 |
| Days to maturity | Low | 13.21** | 1.74** | 5.99 | 119.17 | 3.48 | 2.05 |
| Optimum | 9.03** | 3.09** | 3.54 | 114.12 | 3.3 | 1.65 |
| Plant height [cm] | Low | 11.32** | 1,24** | 9.29 | 52.93 | 3.84 | 5.76 |
| Optimum | 39.52** | 8.36** | 9.95 | 63.49 | 5.82 | 4.97 |
| Number of fertile tillers plant-1 | Low | 0.20** | 0.09** | 0.69 | 2.55 | 0.83 | 32.57 |
| Optimum | 0.53** | 0.00ns | 0.94 | 3.67 | 1.01 | 26.48 |
| Spike length [cm] | Low | 1.03** | 0.06** | 0.33 | 5.13 | 0.77 | 11.2 |
| Optimum | 1.05** | 0.00ns | 0.36 | 5.58 | 0.7 | 10.67 |
| Number of spikelet’s spike-1 | Low | 0.77** | 0.25** | 1.63 | 15.68 | 1.41 | 8.14 |
| Optimum | 0.84** | 0.25** | 1.17 | 17.16 | 1.29 | 6.3 |
| Number of seeds spike-1 | Low | 61.17** | 8.03** | 36.18 | 42.23 | 8.05 | 14.24 |
| Optimum | 102.38** | 1.45ns | 31.55 | 47.42 | 6.67 | 11.85 |
| Grain yield [t ha-1] | Low | 0.03** | 0.07** | 0.25 | 1.98 | 0.41 | 25.22 |
| Optimum | 0.07** | 0.06* | 0.49 | 3.83 | 0.57 | 18.3 |
| Biomass yield  [t ha-1] | Low | 0.23** | 0.25** | 1.02 | 5.94 | 0.98 | 16.99 |
| Optimum | 0.79** | 0.32** | 1.83 | 10.61 | 1.5 | 12.77 |
| Harvest index [%] | Low | 0.00** | 0.00** | 0.00 | 0.33 | 0.05 | 15 |
| Optimum | 0.00** | 0.00ns | 0.00 | 0.36 | 0.05 | 13.89 |
| NDVI | Low | 6.11** | 3.51** | 26.05 | 49.48 | 4.86 | 10.31 |
| Optimum | 11.03** | 2.29** | 19.44 | 65.79 | 4.95 | 6.70 |

***Note:*** ** and ** are significant at the probability levels of P< 0.05 and 0.01, respectively; ON=optimum nitrogen; LN=low nitrogen; G= genotype, L= locations, NDVI=normalized difference vegetative index.*

Table S 7 Summary of the ANOVA for grain yield and stress indices under optimum and low N conditions susceptibility

| Grain yield/Stress index | Variances by sources of variation | | | Grand mean |
| --- | --- | --- | --- | --- |
| Genotypes | Genotype x location | Residual (Error) |
| Grain yield under unstressed condition | 0.07** | 0.06** | 0.49 | 3.83 |
| Grain yield under stressed condition | 0.03** | 0.07** | 0.25 | 1.98 |
| Stress susceptibility index | 0.06** | 0.06* | 0.57 | 3.57 |
| Stress tolerance index | 0.01** | 0.01** | 0.04 | 0.53 |
| Yield stability index | 0.00ns | 0.00ns | 0.03 | 0.55 |
| Mean productivity | 0.11** | 0.14** | 0.57 | 4.82 |
| Tolerance index | 0.01ns | 0.03ns | 0.71 | 1.86 |
| Relative reduction due to stress | 0.00ns | 0.00ns | 0.03 | 0.45 |
| Yield index | 0.01** | 0.02** | 0.06 | 1.00 |
| Geometric mean productivity index | 0.04** | 0.07** | 0.19 | 2.69 |

***Note:*** ** and ** are significant at P < 0.05 and 0.01 probability levels, G=genotypes, GXL=genotype X location, R=Residual*
